# Supplementary material for: Development and multi-laboratory verification of U.S. EPA method 538 for the analysis of drinking water contaminants by direct aqueous injection-LC/MS/MS
Source: Royal Society of Chemistry journal article supplement (doi:10.1039/c1ay05134b), 2011-01-01
Supplement: c1ay05134b.pdf [file c1ay05134b.pdf]

Supplementary Information for *Development and Multi-laboratory Verification of U.S. EPA Method 538 for the Analysis of Drinking Water Contaminants by Direct Aqueous Injection-LC/MS/MS*

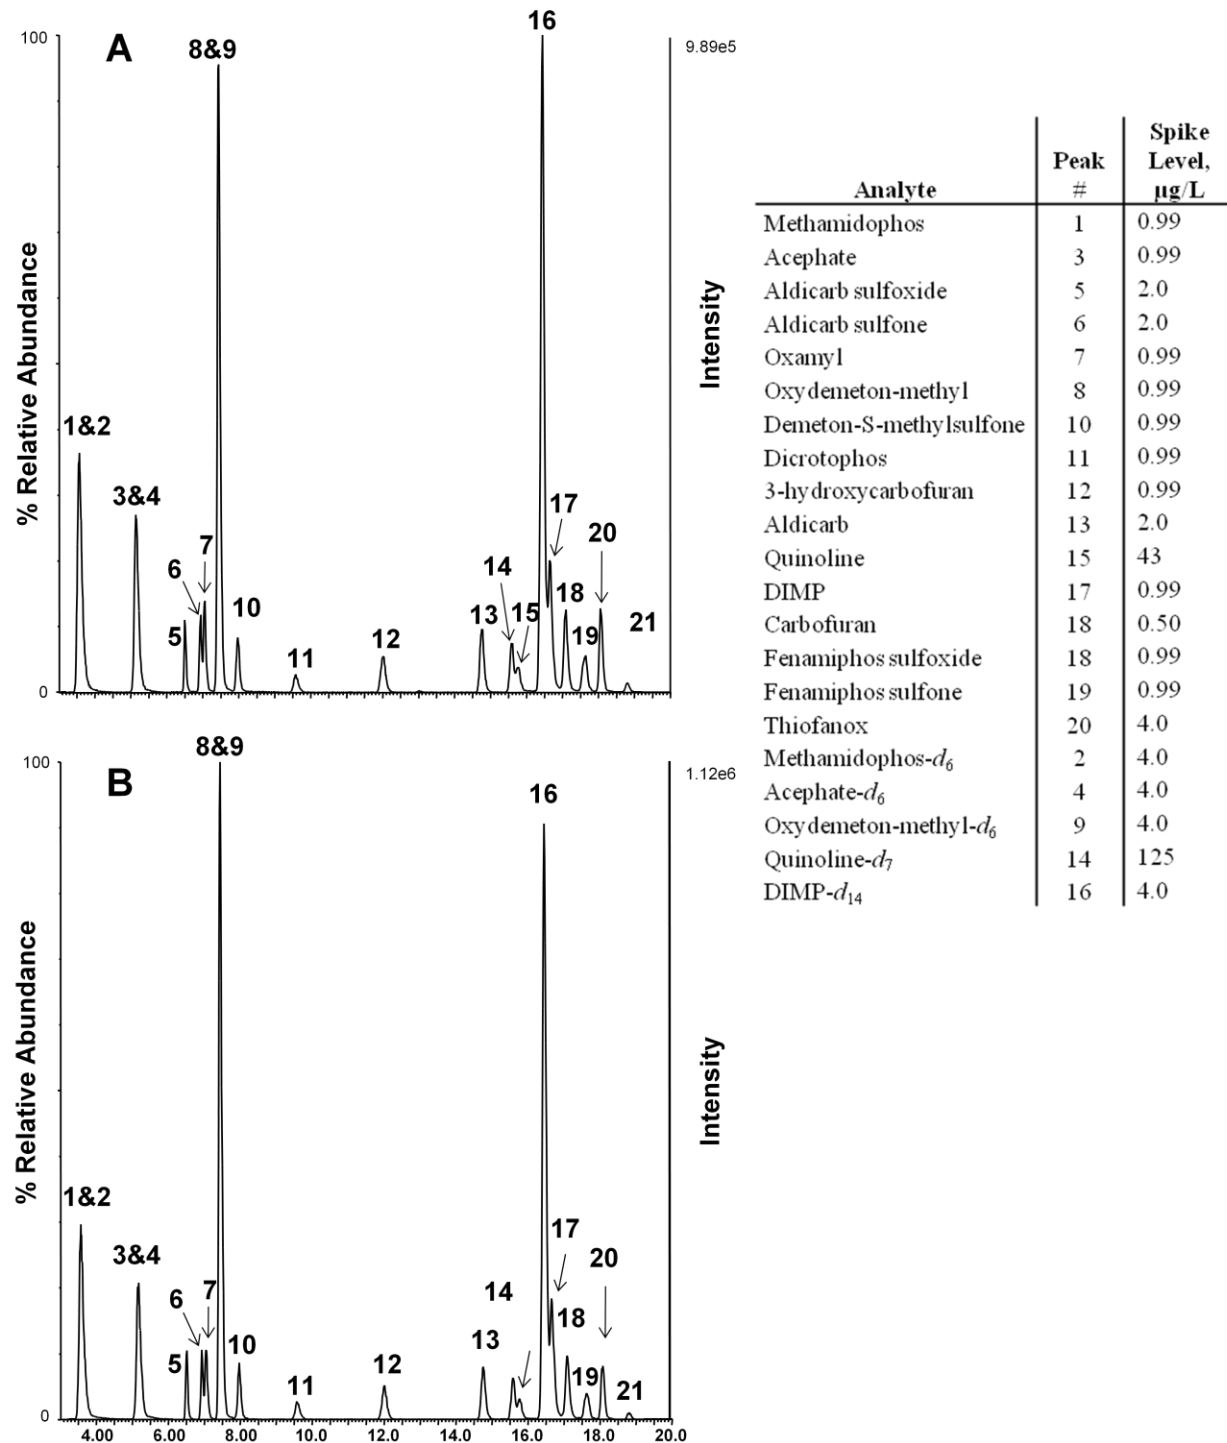

**Figure S1:** Chromatograms of A) deionized water fortified with 8.7 mg/L TOC using natural organic material and with method analytes and B) deionized water fortified with the method analytes. The MS/MS precursor-product ion mass traces were overlaid to create the chromatograms.
